# Supplementary material for: Technical note: A closed chamber method to measure greenhouse gas fluxes from dry sediments
Source: Copernicus journal article supplement (doi:10.5194/amt-2016-384), 2017-02-13

# Technical note: A closed chamber method to measure greenhouse gas fluxes from dry sediments

Lukas Lesmeister, Matthias Koschorreck

## Supplemental material

### 5 Figure S1: Laboratory setup to test chamber sealing.

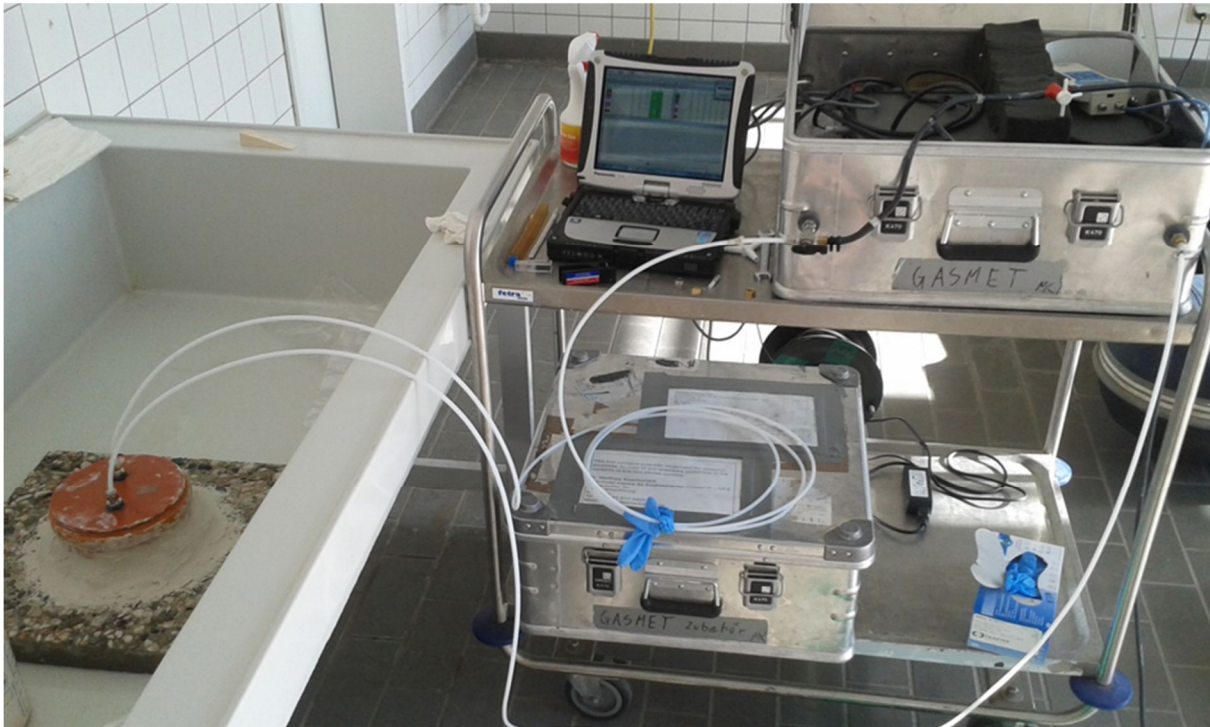

**Figure S2: Field test sites.**

Bridge soil site: near the shore of the river Elbe in Magdeburg, Germany (coordinates: 52° 7.62' N, 11° 39.04' O).

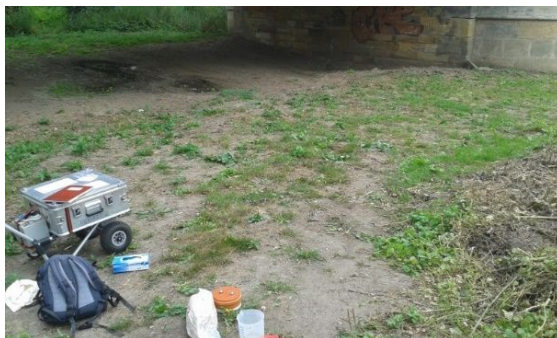

River sand site: Right shore (summer dry river bed) of the river Elbe in Magdeburg, Germany (coordinates: 52° 7.92' N, 11° 39.42' O).

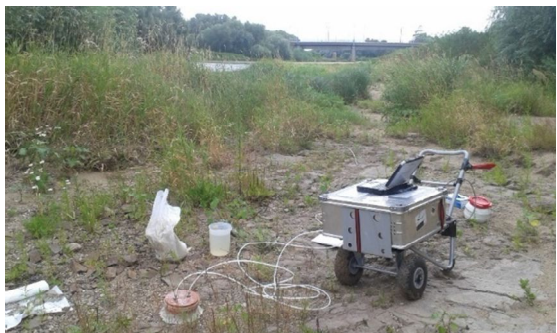

Shores of Rappbode reservoir in the Harz mountains in Saxony-Anhalt, Germany, slightly north-west from the Hassel pre-dam (coordinates: 51° 43.83' N, 10° 52.63' O).

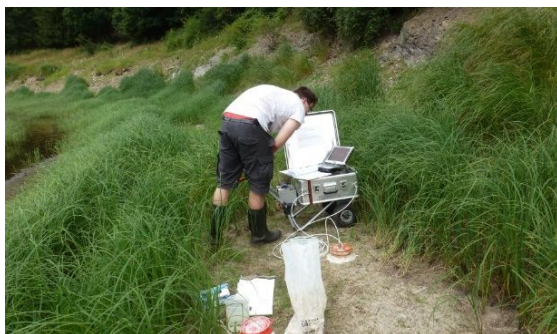

**Figure S3: Sealing the chamber with clay.**

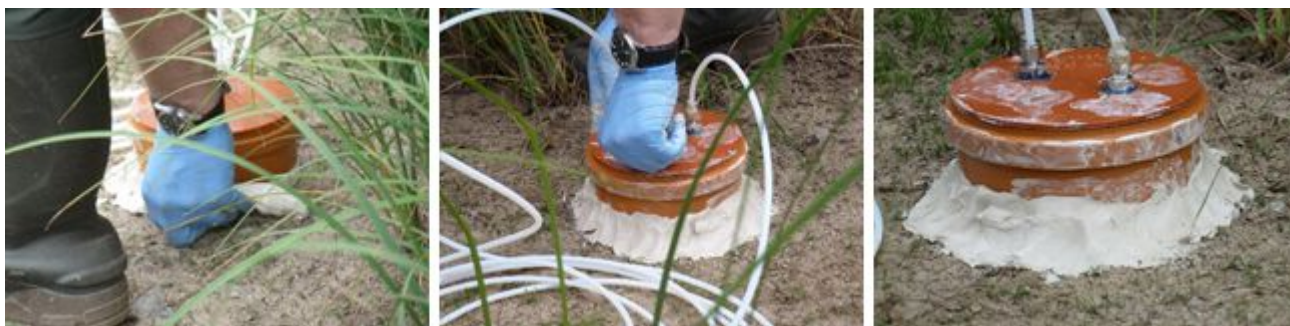

Supplement: Supplementary file 1 [file amt-2016-384-supplement.pdf]
